# Supplementary material for: Direct determination of soil texture using laser-induced breakdown spectroscopy and multivariate linear regressions
Source: Royal Society of Chemistry journal article supplement (doi:10.1039/c9ja00090a), 2019-01-01
Supplement: c9ja00090a1.pdf [file c9ja00090a1.pdf]

## Electronic supplementary information

### Figure captions:

**Fig. S1** PCA scree plot, which show the proportion of variance explained by each principal components (PCs). The number of PCs was chosen using the elbow method.

**Fig. S2** Normal Q-Q plots on the standardized residuals for the prediction of sand, silt and clay percent using elastic net and PLS regressions.

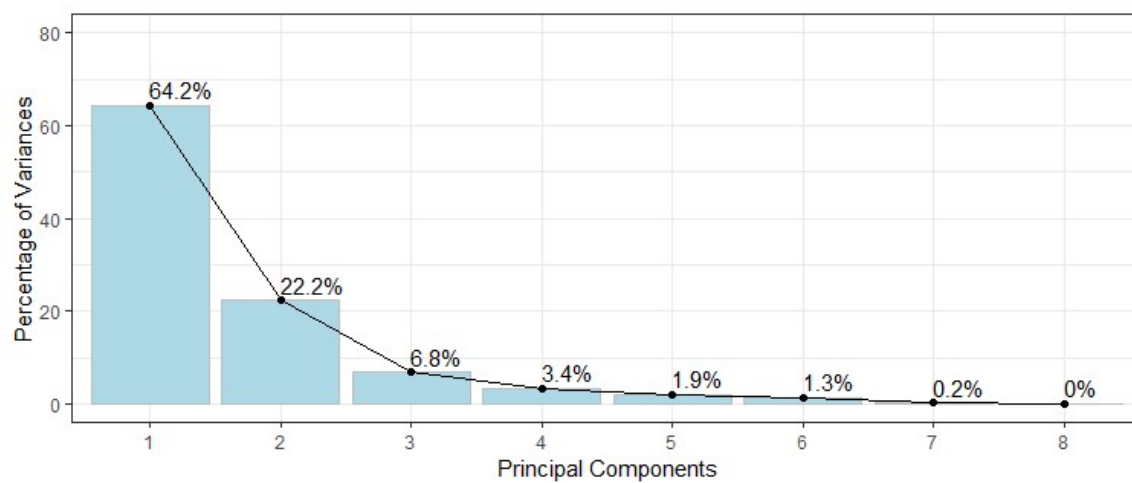

**Fig. S1**

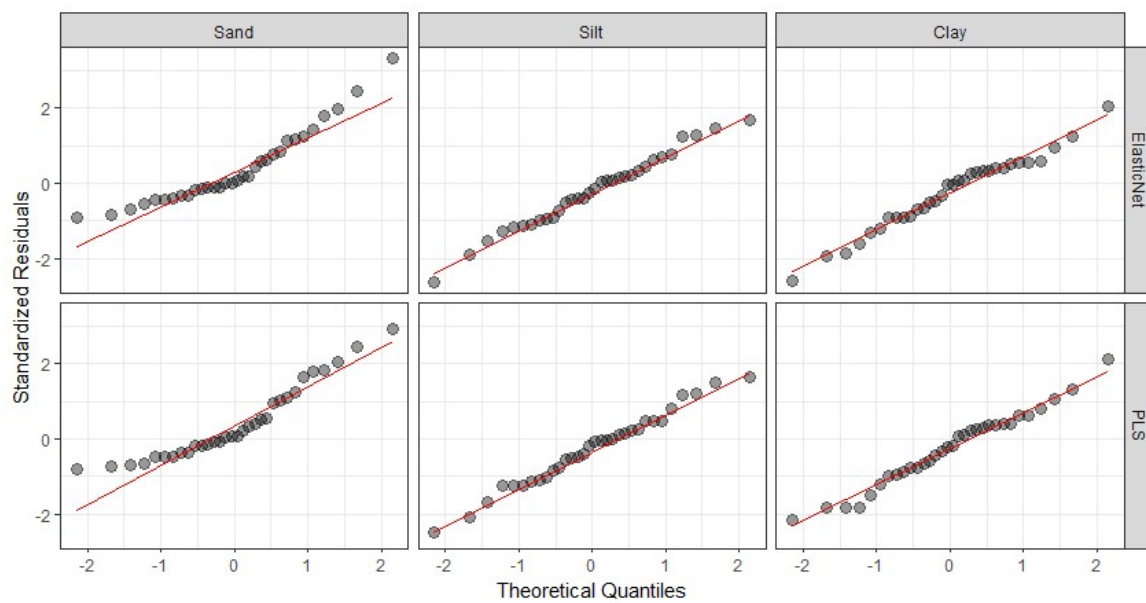

**Fig. S2**
